# Supplementary material for: Functional Assessment of Human Coding Mutations Affecting Skin Pigmentation Using Zebrafish
Source: PLoS One. 2012 Oct 10;7(10):e47398. doi: 10.1371/journal.pone.0047398 (PMC3468441; doi:10.1371/journal.pone.0047398)
Supplement: Table S1 — Primers used for study. (XLS) [file pone.0047398.s006.xls]

## Sheet: Sheet1
Species and Gene	Primer	(5’>3’) Sequence	Purpose
Zebrafish slc45a2	zf_slc45a2_ex6_F	5’-TTAGCACTGGAAGACGTGTG-3’	PCR, ex6 sequencing
	zf_slc45a2_ex6_R	5’-CACCCCTGCCTTAGATCATT-3’	PCR, ex6 sequencing
	zf_slc45a2_cDNA_F	5’-CAAGAGTTTTACCATCCAGAACC-3’	PCR, cDNA sequencing
	zf_slc45a2_cDNA_R	5’-GAAAGGGTATTTATTTGAGGCTTA-3’	PCR, cDNA sequencing
	zf_slc45a2_cDNA_R’	5’-GCTTTAATGGGTCCGTCAAT-3’	cDNA sequencing
	zf_slc45a2_cDNA_F’	5’-TGCAGTCACAACAGCCATAA-3’	cDNA sequencing
	zf_slc45a2_cDNA_R’	5’-CAGCATACGGATTCCCCTTA-3’	cDNA sequencing
	zf_slc45a2_cDNA_F’	5’-CTGCATGACTCATCTGTTGG-3’	cDNA sequencing
	zf_slc45a2_(E272K)_F	5’-GTGTCTCTTTCTAACGTGAGGAAGCGCACCTTCTCTGTCCTGAGT-3’	PCR mutagenesis
	zf_slc45a2_(E272K)_R	5’-ACTCAGGACAGAGAAGGTGCGCTTCCTCACGTTAGAAAGAGACAC-3’	PCR mutagenesis
	zf_slc45a2_(L374F)_F	5’-GTTGAAGTGGGCTGTTGGGGTTTTTGCATCAACGCCGTCTCCTCT -3’	PCR mutagenesis
	zf_slc45a2_(L374F)_R	5’-AGAGGAGACGGCGTTGATGCAAAAACCCCAACAGCCCACTTCAAC-3’	PCR mutagenesis
Human SLC45A2	hu_SLC45A2_cDNA_F	5’-AGGAAGGTTCCTCTCCCAGT-3’	PCR, cDNA sequencing
	hu_SLC45A2_cDNA_R	5’-TCTGAGGTTAGGGTCATTGTCTC-3’	PCR, cDNA sequencing
	hu_SLC45A2_cDNA_R’	5’-TAGTGGAGGCCCTTCTCCTT-3’	cDNA sequencing
	hu_SLC45A2_cDNA_F’	5’-CTGGTTTGGGCCATAAGTGT-3’	cDNA sequencing
	hu_SLC45A2_cDNA_R’	5’-CAACCTCGACTCCTCTTTCG-3’	cDNA sequencing
	hu_SLC45A2_cDNA_F’	5’-AACATGCCTCCTCACTACCG-3’	cDNA sequencing
	hu_SLC45A2(E272K)_F	5'-GGGTTACCTTTTGGGTGCTA-3'	E272K SNP genotyping
	hu_SLC45A2(E272K)_R	5'-TGTTCAGCATGATTTTTGTTTTT-3'	E272K SNP genotyping
	hu_SLC45A2(L374F)_F	5'-GAGATCTGATGCAGCAAGCA-3'	L374F SNP genotyping
	hu_SLC45A2(L374F)_R	5'-GGGACTCATCCATCCAACAC-3'	L374F SNP genotyping
Zebrafish slc24a5	zf_slc24a5_(A111T)_F	5’- CTCTCGCAGGATGTTGCTGGAACAACGTTTATGGCTGCGGGGAGT - 3’	PCR mutagenesis
	zf_slc24a5_(A111T)_F	5’- ACTCCCCGCAGCCATAAACGTTGTTCCAGCAACATCCTGCGAGAG - 3’	PCR mutagenesis
	hu_SLC45A2_cDNA_R’	5’-TAGTGGAGGCCCTTCTCCTT-3’	cDNA sequencing
	hu_SLC45A2_cDNA_F’	5’-CTGGTTTGGGCCATAAGTGT-3’	cDNA sequencing
	hu_SLC45A2_cDNA_R’	5’-CAACCTCGACTCCTCTTTCG-3’	cDNA sequencing
	hu_SLC45A2_cDNA_F’	5’-AACATGCCTCCTCACTACCG-3’	cDNA sequencing
Human SLC24A5	hu_SLC24A5 F(A111T)	5'-TCATAAAGAAGCAAAACATTGGA-3'	A111T SNP genotyping
	hu_SLC24A5 R(A111T)	5'-AGCACAGATGCCAAGGAGAT-3'	A111T SNP genotyping
